---

## Libri

---

*Jorge J. Yunis* (Editor): **Human Chromosome Methodology**. Academic Press, New York/London 1965. 258 pp. Price: \$ 8.50.

This book is very valuable for those not fully familiar with the widely scattered literature on the technical aspects of chromosome studies. Most of the chapters describe in detail the procedure for the examination of chromosomes in man and list the many pitfalls which may particularly trouble those who do not continuously research or make clinical tests in this field. MURRAY L. BARR has written the chapter on 'Sex Chromatin Techniques', W.J. MELLMAN on 'Human Peripheral Blood Leucocyte Cultures', TJIO AND WANG on 'Direct Chromosome Preparations of Bone Marrow Cells'. Others chapters are on 'Skin Culture Techniques' (HARDEN AND BRUNTON), direct handling of germ cells (S. OHNO), autoradiography of human chromosomes. The chapter by W.J. RUNGE on 'Bright Field, Phase Contrast and Fluorescence Microscopy' is not quite satisfactory. 'Applied Photography in Chromosome Studies' has L. P. CHRISTENSEN as author. Although not strictly belonging to methodology are the chapters on 'Identification of Chromosomes' and the excellent presentation by the editor J. J. YUNIS 'Human Chromosomes in Diseases'. In all: a very welcome addition to the clinician, the geneticist and the laboratory worker interested in chromosome studies.

G. ROSENOW, New York

*F. Homburger*: **Progress in Experimental Tumor Research**. Vol. 7. Karger, Basel/New York 1965, VIII + 351 S., 42 Abb., 25 Tab., Preis: sFr./DM 95.-.

Bereits wenige Monate nach dem Band 6 liegt nun auch der 7. Band der «Progress in Experimental Tumor Research» vor. Er ist wiederum von F. HOMBURGER, Cambridge, Mass., umsichtig redigiert und vom Verlag S. Karger in gewohnter ansprechender Weise ausgestattet worden. Entsprechend der momentanen Entwicklung in der experimentellen Tumorforschung liegt das Hauptgewicht auf virologischen und immunologischen Aspekten. Im 1. Kapitel gibt L. A. ZILBER (Moskau) unter dem Titel: «Pathogenicity and Oncogenicity of Rous Sarcoma Virus for Mammals» eine umfassende Literaturübersicht über das breite Wirkungsspektrum des Rous'schen Sarkom-Virus. In seiner Arbeit über «Experimental Radiation Carcinogenesis» beleuchtet GEORGE W. CASARETT (Rochester, N. Y.) Probleme der Strahlen-Karzinogenese. Er legt dabei besonderes Gewicht auf Begleitfaktoren, wie endokrine und metabolische Einflüsse, genetische Faktoren, Virusaktivierung und immunologische Mechanismen. PETER C. NOWELL (Philadelphia, Pa.) berichtet über «Chromosome Changes in Primary Tumors» unter besonderer Berücksichtigung tierischer und menschlicher Leukämien. Das nächste von G. I. ABELEV (Moskau) verfaßte Kapitel: «Antigenic Structure of Chemically-Induced Hepatomas» befaßt sich mit der immunochemischen Analyse der Antigene in experimentellen Lebertumoren. In ihrer Arbeit über «Control Mechanisms in the Normal Neoplastic Cell» diskutieren HENRY C. PITOT und YOON SANG CHO (Madison, Wis.) an einigen Beispielen Kontrollmechanismen der genetischen Information in normalen und neoplastischen Zellen unter Berücksichtigung modernster molekularbiologischer Erkenntnisse. P. G. STANLEY (Detroit, Mich.) bespricht in seiner Arbeit: «Non-Oncogenic Infections Agents Associated with Experimental Tumors» die Bedeutung der nicht-onkogenen Erreger, die häufig mit Tumoren zusammen vorkommen und den

Krankheitsablauf entscheidend beeinflussen. Im letzten Kapitel gibt L. LEE BENNET JR. (Birmingham, Ala.) eine umfassende Übersicht über die antileukämische Wirkungsweise von Terephthalanilid-Derivaten, unter dem Titel: «Phthalanilides and Some Related Dibasic and Polybasic Compounds: A Review of Biological Activities and Modes of Action».

Alle Beiträge vermitteln eine wegleitende Übersicht über den neusten Stand der Kenntnisse auf den behandelten Gebieten.

F. FLOOR, Basel

**Beschaffung und Konservierung von Nieren für die Nierentransplantation.** (*Calne R. Y.*: Supply and Preservation of Kidneys. Brit. Med. Bull. 21: 1965.)

Zur Transplantation werden Nieren von lebenden und von toten Menschen und von lebenden nichtmenschlichen Primaten verwendet.

Der Überpflanzung einer gesunden Niere von einem lebenden Menschen auf einen urämischen Patienten stehen wegen der Gefährdung des Spenders durch die Nephrektomie, der Möglichkeit der Erkrankung seiner Restniere und der Unsicherheit des Transplantationserfolges moralisch-ethische Bedenken gegenüber. (Überlebensrate nach einem Jahr bei Transplantation zwischen identischen Zwillingen 74%, zwischen Geschwistern 39%, zwischen andern Blutsverwandten 20%, bei Verwendung von Kadavernieren 7%, bei Verwendung von nicht blutsverwandten lebenden Spendern 0%). Das Operationsrisiko bei der Entnahme der Niere ist wegen der ausgedehnten Präparation der Nierengefäße größer als das einer einfachen Nephrektomie. Bis heute ist allerdings kein Fall mit tödlichem Ausgange bekannt. Der Entscheid eines Spenders, eine seiner Nieren zu opfern, erfolgt möglicherweise nicht immer in voller Freiheit, sondern unter dem sich aus der Situation ergebenden Druck. Die Lage würde in dieser Hinsicht noch verschärft, wenn uns zuverlässliche Methoden zur Erfassung des immunologisch besten Spenders zur Verfügung stünden. Aus moralischen Gründen müßte vielleicht ein solches Selektionsverfahren, so wünschenswert es aus medizinischen Gründen auch wäre, nicht der Auslese des geeignetsten Donators, sondern der Elimination der unbrauchbaren Spender dienen. Den Nachteilen bei der Verwendung der Niere von lebenden Spendern stehen aber auch gewichtige Vorteile gegenüber, indem die Möglichkeit besteht, die für eine Transplantation geeignetste Niere zu wählen (z. B. Blutsverwandte). Ein zweites Vorteil ergibt sich daraus, daß die Ischämiezeit der zu transplantierenden Niere auf einem Minimum gehalten werden kann mit guter Aussicht auf sofortige und gute Funktion nach Revaskularisation. Die Ansichten der einzelnen Gruppen über die Verwendung der Nieren von lebenden Spendern sind geteilt: die einen befürworten dieses Verfahren, da es für den kranken Patienten die besten Erfolgsaussichten bietet, die andern fordern Zurückhaltung wegen der noch ungewissen Spätergebnisse. Sie weisen darauf hin, daß auch unter den günstigsten Voraussetzungen – Transplantation zwischen einiigen Zwillingen – die Spätprognose dadurch getrübt wird, daß beim Vorliegen einer Glomerulonephritis die transplantierte Niere ebenfalls von dieser Krankheit befallen werden kann. Nach Ansicht des Verfassers ist deswegen die Verwendung der Niere eines lebenden Spenders nur dann gerechtfertigt, wenn die Erfolgsaussichten der Transplantation günstig beurteilt werden und der Spender eingehend über alle Risiken aufgeklärt wurde. Die moralisch-ethischen Bedenken werden bei der Verwendung der Niere eines lebenden Spenders dann gegenstandslos, wenn eine sogenannte «freie» Niere vorliegt, d. h. wenn die Niere aus andern Gründen (Tumor im unteren Ureter, Anastomose des Ureters mit dem Subarachnoidealraum) entfernt werden muß. Vor der Transplantation müssen die Spender einer gründlichen physischen und psychischen Untersuchung unterzogen werden. Die Abklärung der Nieren selbst umfaßt Nierenfunktionsproben, ein intravenöse Pyelogramm und eine Aortographie. Die Transplantation soll nur dann vorgenommen werden, wenn in bezug auf das AB0-Blutgruppensystem zwischen Empfänger und Spender eine kompatible Kombination vorliegt. Bei der Verwendung der

Nieren von Zwillingen ist die Prüfung auf genetische Identität notwendig: Gleichheit der wichtigsten Merkmale wie Geschlecht und Blutgruppe und erfolgreiches Angehen und Fortbestand einer reziproken Hauttransplantation.

Bei der Verwendung von Kadavernieren ist auf die Gefühle der Hinterbliebenen und die gesetzlichen Vorschriften Rücksicht zu nehmen. Die juristische Definition des Todes ist heute schwierig geworden, da die üblichen Kriterien in besondern Situationen nicht ausreichen. Eine solche Lage besteht dann, wenn die vegetativen Funktionen durch Herzmassage, künstliche Beatmung oder extrakorporellen Kreislauf allein noch möglich sind. Die Verwendung von Kadavernieren ist an bestimmte Voraussetzungen gebunden: intra vitam darf keine Nierenerkrankung, keine Infektion der Harnwege, keine Hypertonie und kein Malignom vorgelegen haben, und der Patient sollte nicht älter als 70jährig sein. Der Tod sollte ohne längere Phase einer arteriellen Hypotonie eingetreten sein. Diese Voraussetzungen sind hauptsächlich dann erfüllt, wenn der Patient an den Folgen eines Hirntumores, eines Schädeltraumas oder eines Herzinfarktes ad exitum kam. Bei Unfalltoten kann die mit den Behörden erforderliche Rücksprache zu einer Verzögerung führen, die den Transplantationserfolg in Frage stellt. An einzelnen Zentren werden nach dem Tode Atmung und Kreislauf durch künstliche Beatmung und Herzmassage bis zur Nephrektomie aufrechterhalten. Die Transplantation muß wegen der Gefahr eines ischämischen Schadens der Niere rasch erfolgen. Die Abkühlung des isolierten Organes durch Perfusion gewährt einen gewissen Schutz.

Die Verwendung von Heterotransplantaten (Pavianen und Schimpansen) war bis heute wenig erfolgreich. Die längste Überlebensdauer betrug 9 Monate nach Implantation der Niere eines Schimpansen, 2 Monate nach Verwendung der Niere von Pavianen.

Aus Gründen der arteriellen Gefäßversorgung eignen sich nicht alle menschlichen Nieren für die Transplantation. Untersuchungen haben ergeben, daß in ca. 50% beidseits Gefäßmißbildungen vorliegen. Die linke Niere zeigt in 33%, die rechte nur in 3% ein normales Verhalten. In nur 5% weisen beide Nieren keine Anomalien auf. Die Ligatur einer zusätzlichen Arterie führt mit größter Wahrscheinlichkeit zu einem Infarkt. Sie darf deswegen nur an einer sehr kleinen Arterie vorgenommen werden. Andererseits dürfen anormale Nierenvenen schadloß ligiert werden wegen der reichlichen intrarenalen venovenösen Verbindungen. Bei der Präparation sollen die Nierengefäße möglichst nahe an Aorta bzw. Hohlvene durchtrennt werden, da sich viele Nierengefäße schon knapp nach ihrem Abgang verästeln. Die große funktionelle Reserve der Niere eines Kindes erlaubt die Verpflanzung in einen Erwachsenen ohne weiteres. Umgekehrt ist es häufig aus Raumgründen schwierig, die Niere eines Adulten einem kleinen Kinde einzuverleiben. Die Dauer der Ischämie ist für die spätere Funktion der Niere wichtig: bei einer Ischämiezeit unter einer Stunde kann mit einer sofortigen und guten Funktion der Niere nach Revaskularisation gerechnet werden, nach 1 bis 2 Stunden treten reversible Schädigungen auf, nach 3 Stunden ist eine Erholung nicht mehr möglich. Durch Abkühlung der Niere gelingt es im Experiment, nach 12stündiger Ischämie eine befriedigende Funktion zu erzielen. Aufbewahrung der gekühlten Niere über 24 Stunden oder länger führt in der Regel zu schwersten irreversiblen Veränderungen. Unterkühlung der Niere durch Gefrieren hat sich bis heute ebenfalls nicht bewährt. Wegen der Unmöglichkeit, mit den heutigen Methoden Nieren länger als höchstens 12 Stunden zu konservieren, ist die Bildung einer eigentlichen Nierenbank im jetzigen Zeitpunkt noch illusorisch.

E. LINDER, Zürich

Hamburger, J. / Richet, G. / Crosnier, J. / Funck-Brentano, J.-L. / Antoine, B. / Ducrot, H. / Méry, J.-P. / Royer, P. et de Montera, H.: **Néphrologie**, partie 1 et 2. Editions médicales Flammarion, Dir. scientifiques, Paris VIe. 2 vol. env. 2000 p., 428 fig., prix 340 F.

Bereits 4 Jahre nach Erscheinen des hervorragenden Bandes von J. HAMBURGER, Paris, und seiner nephrologischen Equipe über die Niereninsuffizienz in der Serie des

Handbuches der Urologie aus dem Springer-Verlag wird mit einer Ergänzung des Mitarbeiterstabes dieses bekannten nephrologischen Zentrums wieder ein großer Beitrag zur modernen Nephrologie, diesmal in der medizinischen Sammlung von Flammarion, Paris, veröffentlicht. Das Werk soll jedes Jahr ergänzt werden. Es handelt sich bei diesen zwei umfangreichen Bänden vor allem um eine klinische Darstellung der gesamten Nephrologie. Nach einer Einleitung über Anatomie und Physiologie der Nieren sowie Semiologie und funktionelle Untersuchungsmaßnahmen werden in vier aufeinanderfolgenden Kapiteln die «grossen Syndrome» (nephrotisches Syndrom, Niereninsuffizienz und renale Hypertonie) bis in alle kleinsten Details in glänzender Weise behandelt. Weitere Abschnitte befassen sich mit den funktionellen Nierenstörungen, den organischen Nephropathien und den umstrittenen Fragen des Zustandes der Nieren bei verschiedenen pathologischen Krankheitsbildern, wobei auch seltene Krankheitszustände und Korrelationen Erwähnung finden. In diesem Kapitel stützen sich die Autoren auf ihre im Pariser urologischen Zentrum gewonnenen Erfahrungen. Die nächsten Kapitel, die nephrologisch-urologische Situationen zur Darstellung bringen wie die Mißbildungen, die Lithiasis, die Tuberkulose, die Nierentumoren und die Pathologie der Nierengefäße, werden nur aus nephrologischer Sicht besprochen, indem auf technische therapeutische Probleme verzichtet wird. Im Schlußkapitel kommen die großen therapeutischen Maßnahmen zur Sprache, u. a. selbstverständlich die Dialyse und die Transplantation der Niere, auf welchem Gebiete das urologische Zentrum von Paris sich einen berühmten Namen gemacht hat. Einmal mehr zeigt dieses neue Werk, daß ein Teamwork in der heutigen Zeit der raschen Entwicklung der modernen Medizin unentbehrlich geworden ist, wenn etwas Neues und gut Fundiertes gebracht werden soll. Wir dürfen deshalb Prof. HAMBURGER danken, daß es ihm gelungen ist, ein ausgezeichnetes Team um sich zu vereinigen, das die Weltliteratur wiederum mit einem wertvollen Buch bereichert hat. Es sind allerdings viele Leser mit dem System der periodischen Ergänzungen eines medizinischen Werkes nicht einverstanden, weil es doch immer wieder vorkommt, daß bestimmte Kapitel vernachlässigt werden. Ich glaube, daß dies im vorliegenden konkreten Falle nicht zutrifft. Die gute Besetzung der Autoren dürfte gewährleisten, daß das ganze Werk à jour gehalten wird.

G. MAYOR, Zürich

Ž. Szendrői / F. Balogh: **Der Prostatakrebs.** 388 S., 96 Abb., 58 Tab. Akadémiai Kiadó, Budapest 1965.

Der Verlag der ungarischen Akademie der Wissenschaften präsentiert mit diesem Buch wiederum eine sehr schöne Monographie über die heutigen Kenntnisse auf dem Gebiete des Prostatakarzinoms. Erfreulicherweise haben sich die Autoren nicht in alle Details der Klinik des Prostatakrebses verloren, wie dies anderweitig oft der Fall ist und wobei immer wieder die gleiche klinische Problematik zur Sprache kommt. Was uns an dieser Studie besonders anspricht, ist die eingehende Besprechung der Pathomorphologie, der Physiologie und der Ätiologie der Prostata malignome. Es werden sehr interessante Aspekte der verschiedenen Probleme der Carcinogenese geboten. Die hormonalen Beziehungen des Prostatakrebses werden auf sehr instruktive Weise dargestellt. Die verschiedenen Faktoren bei der Entstehung des Prostatakrebses werden berücksichtigt, wobei neben den lokalen Verhältnissen besondere Beachtung der Leber und dem Steroidstoffwechsel geschenkt wird. Die pathologisch-anatomische Betrachtung über die Malignome der Vorstehdrüse enthalten alles, was man über dieses Gebiet wissen muß, seien es die verschiedenen Formen, die histologische Differentialdiagnose, Ausgang und Wege der Metastasen sowie das Übergreifen auf die Nachbarorgane. Der klinische Teil stützt sich auf 430 Krankengeschichten von beobachteten Patienten. Im Kapitel «Diagnose» werden alle möglichen Laboruntersuchungen, Röntgenmaßnahmen und verschiedene Biopsiewege aufgeführt. Das Kapitel der Therapie des Prostatakrebses befaßt sich hauptsächlich mit den konservativen Maßnahmen wie Anwendung

von Hormonen, Corticosteroiden und Antimetaboliten. In einem besonderen Abschnitt werden die Maßnahmen mit hormonaler Wirkung – Orchiektomie, Hodenbestrahlung, Hypophysenoperationen, Adrenalektomie u. a. – erwähnt. Nach einem kurzen Überblick über den jetzigen Stand der Chemotherapie folgt die Strahlenbehandlung des Prostatakrebses. Es werden dabei die konventionelle Röntgenbestrahlung, die Radiumtherapie, die Anwendung von  $\text{Co}^{60}$  und anderer Isotopen skizziert. Im Abschnitt über die chirurgische Behandlung der Prostatageschwülste zählen die Autoren heute alle bekannten operativen Verfahren mit ihren verschiedenen Zugangswegen auf. Es handelt sich dabei mehr um eine Übersicht als um eine erschöpfende Darstellung, in der aber sehr brauchbare Hinweise auf die perineale und die radikale Prostatektomie gegeben werden. Ein letztes Kapitel ist dem selten vorkommenden und kaum wirksam zu behandelnden Prostatasarkom gewidmet. Ein enormes Literaturverzeichnis von ca. 1500 Zitationen, wobei auch die letzten Angaben berücksichtigt werden, beschließt den Band, der sowohl dem Urologen und Chirurgen wie auch dem Internisten, Endokrinologen und Pathologen sehr empfohlen werden kann.

G. MAYOR, Zürich
